# Supplementary material
Source: Springer Nature journal article supplement (https://www.springermedizin.de/resource/supplementary/12914_2012_237_MOESM1_ESM.pdf/9537226)

Figure 1: Acceptability of contraceptives across the states

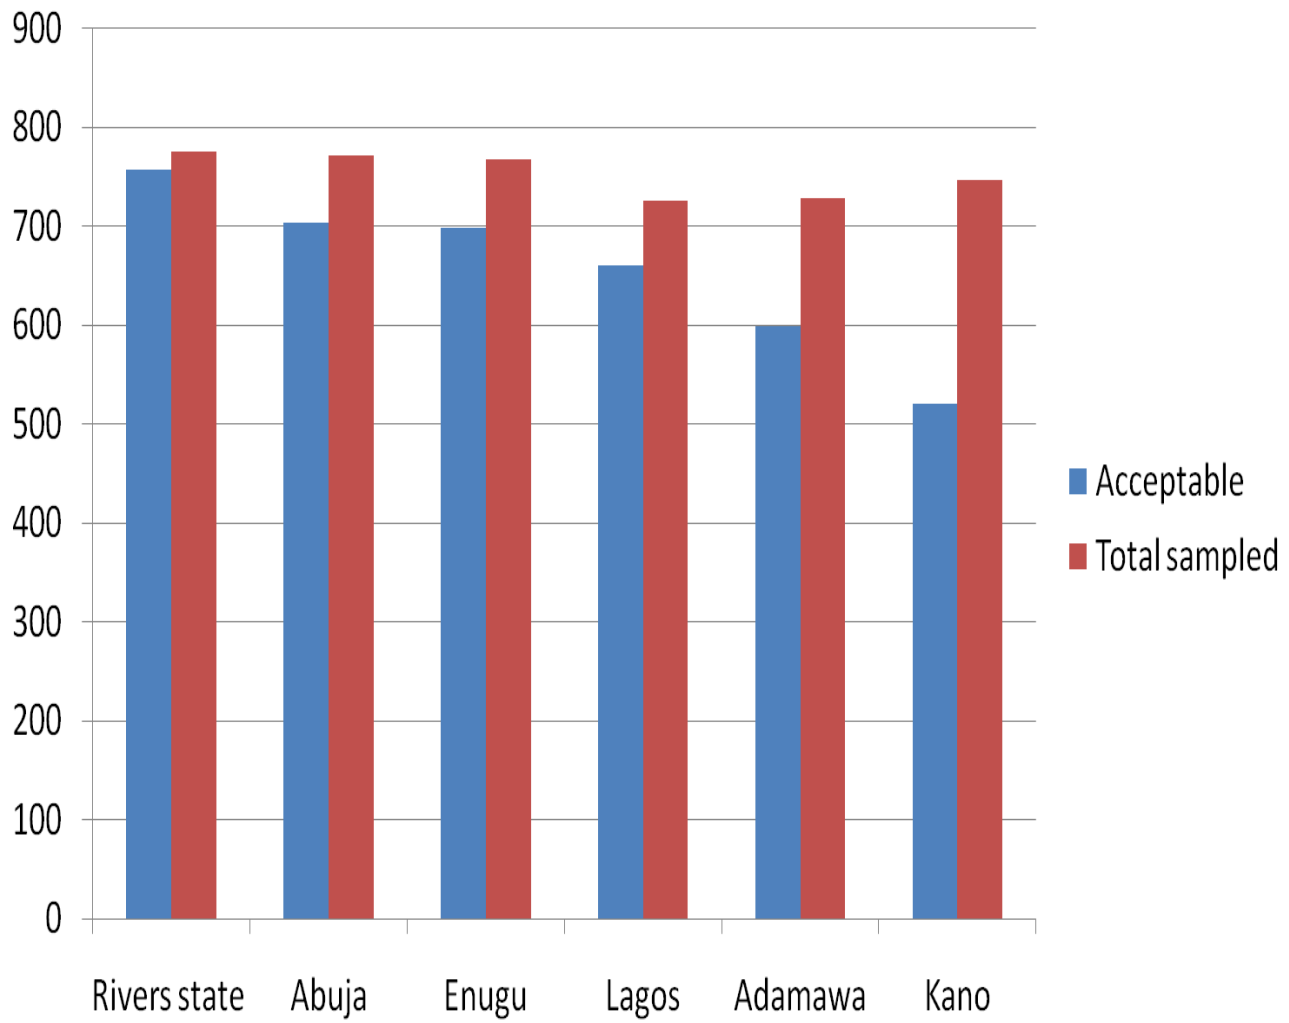

Supplement: MOESM1 [file 9537226]
